# Supplementary material
Source: MDPI journal article supplement (https://www.mdpi.com/1996-1073/15/22/8774)

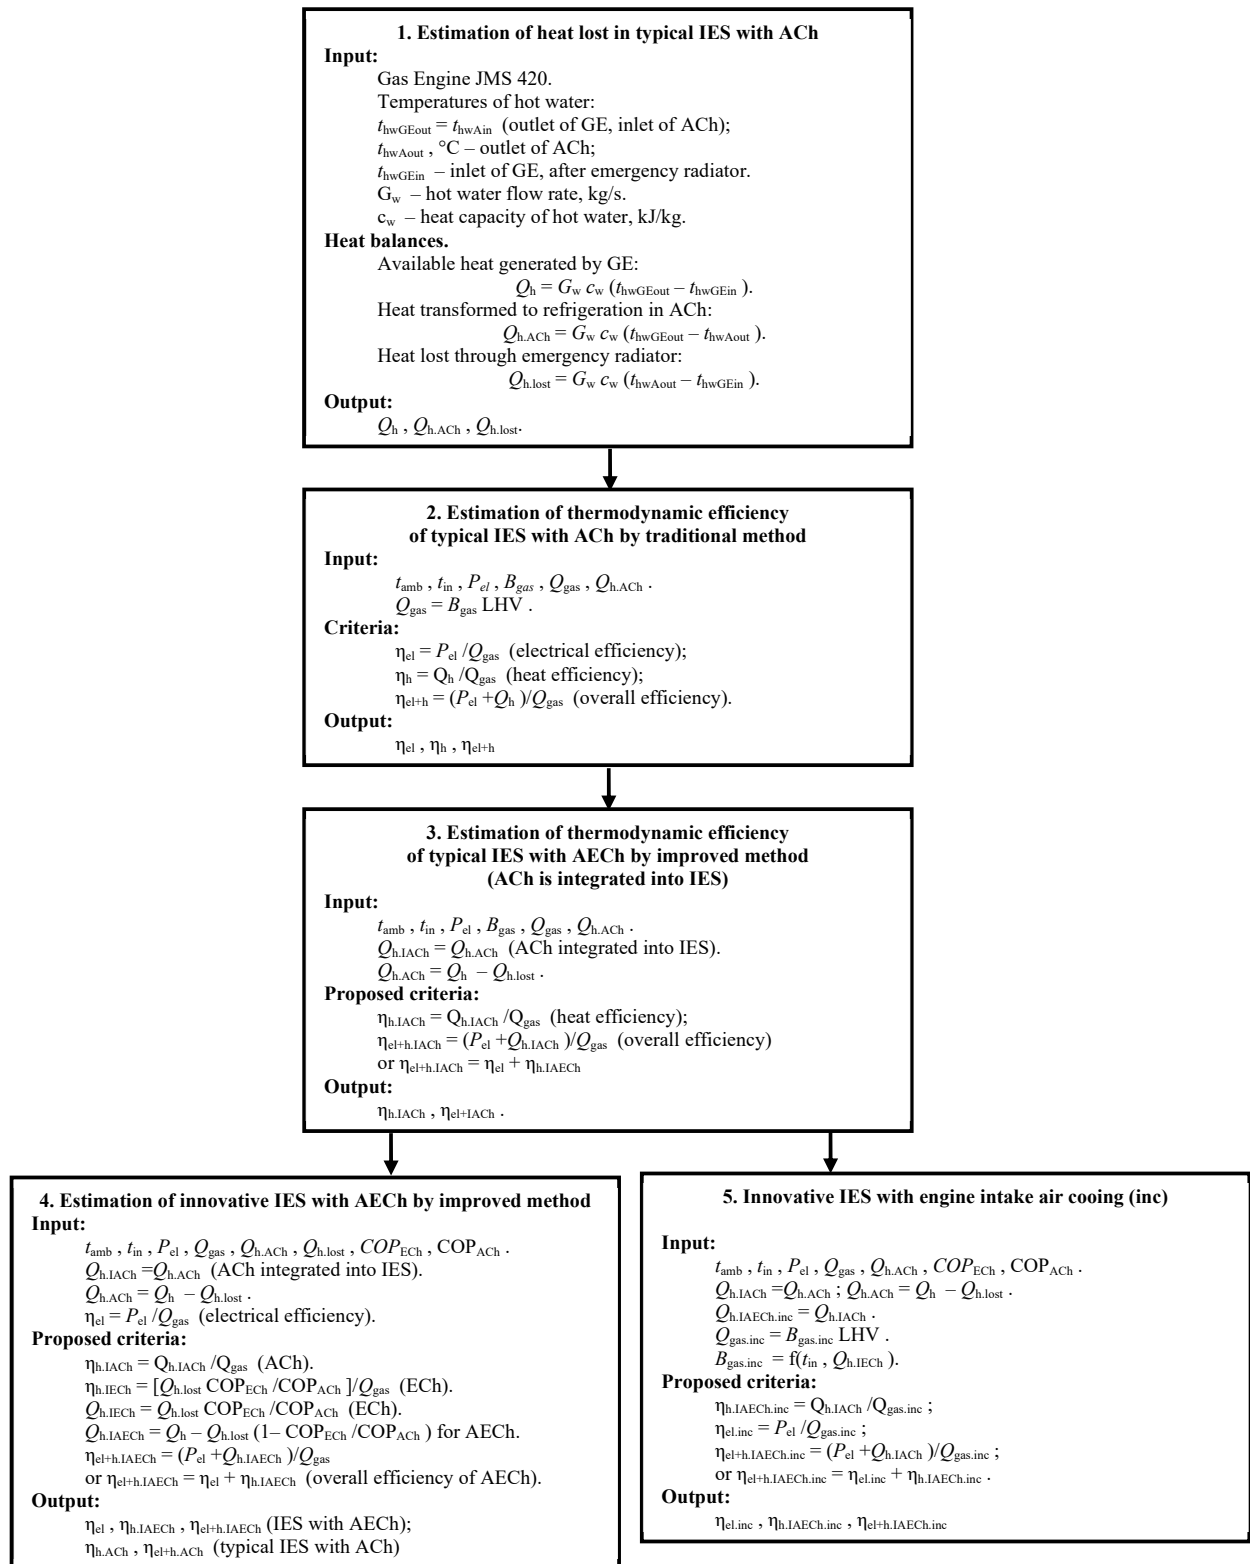

Supplement. Flow sheet of investigation.

Supplement: s1 [file s1]
